# Supplementary material
Source: PubMed Central journal article supplement (PMC10357934)
Supplement: MD-014-D3MD00134B-s001.pdf [file MD-014-D3MD00134B-s001.pdf]

## Supporting Information

### Design, Synthesis, and Mechanistic Study of 2-Piperazineone-bearing Peptidomimetics as Novel HIV Capsid Modulators

Xujie Zhang<sup>a,1</sup>, Lin Sun<sup>a,b,1</sup>, Shujing Xu<sup>a</sup>, Tianguang Huang<sup>a</sup>, Fabao Zhao<sup>a</sup>, Dang Ding<sup>a</sup>, Chuanfeng Liu<sup>a</sup>, Xiangyi Jiang<sup>a</sup>, Yucen Tao<sup>a</sup>, Dongwei Kang<sup>a</sup>, Erik De Clercq<sup>e</sup>, Christophe Pannecouque<sup>e,\*</sup>, Simon Cocklin<sup>d,\*</sup>, Alexej Dick<sup>c,\*</sup>, Xinyong Liu<sup>a,\*</sup>, Peng Zhan<sup>a,\*</sup>

<sup>a</sup>*Department of Medicinal Chemistry, Key Laboratory of Chemical Biology (Ministry of Education), School of Pharmaceutical Sciences, Shandong University, 44 West Culture Road, 250012 Jinan, Shandong, PR China.*

<sup>b</sup>*Department of Pharmacy, Qilu Hospital of Shandong University, 107 West Culture Road, Jinan 250012, Shandong, PR China.*

<sup>c</sup>*Department of Biochemistry & Molecular Biology, Drexel University College of Medicine, Philadelphia, Pennsylvania, PA 19102, USA.*

<sup>d</sup>*Specifica, Inc., 1607 Alcala Street, Santa Fe, NM, 87501, USA.*

<sup>e</sup>*Rega Institute for Medical Research, Laboratory of Virology and Chemotherapy, K.U. Leuven, Herestraat 49 Postbus 1043 (09.A097), 3000, Leuven, Belgium.*

<sup>1</sup> These authors contributed equally.

\*Corresponding authors. E-mail address: christophe.pannecouque@kuleuven.be (Pannecouque C.); simoncocklin@hotmail.com (Cocklin S.); ad3474@drexel.edu (Dick A.), xinyongl@sdu.edu.cn (Liu X.Y.); zhanpeng1982@sdu.edu.cn (Zhan P.).

*Contents*

**I. Supplemental Results of SPR Assay**

**II. Supplemental Results of Single-Round Infection Assay**

**III. Metabolic Stability in Human Liver Microsomes**

**IV. Stability in Human Plasma**

**V. HRMS, <sup>1</sup>H-NMR and <sup>13</sup>C-NMR Spectra for Representative Target Compounds**

## I. Supplemental Results of SPR Assay

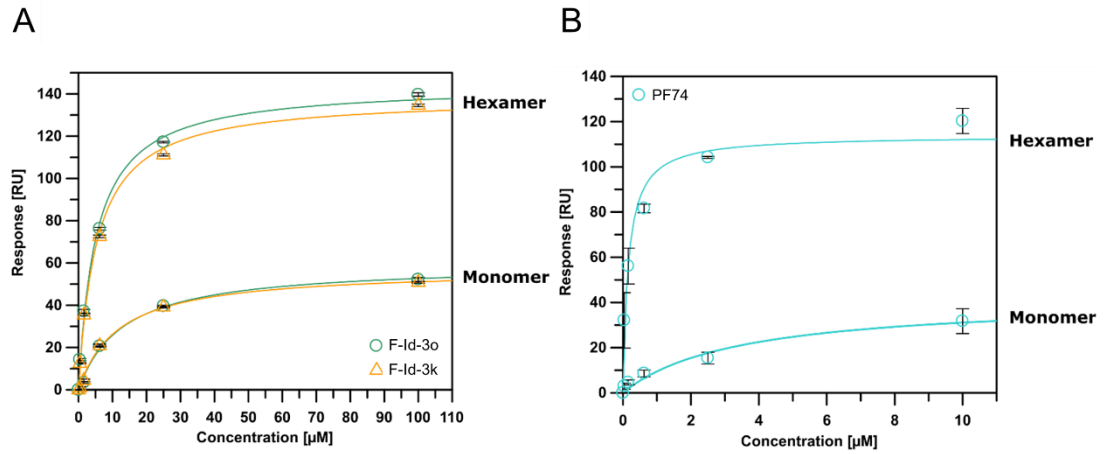

**Figure S1.** SPR isotherms of **F-Id-3k** and **F-Id-3o** (A) binding to two variants of the CA protein (monomer and disulfide-stabilized hexamer), respectively, with **PF74** (B) as the reference. Isotherms are an average of 3 replicates with error bars represent standard deviation (SD)

## II. Supplemental Results of Single-Round Infection Assay

**Table S1.** Supplemental results of single-round infection assay in early stage

| <b>Compounds</b> | <b>Concentration (<math>\mu\text{M}</math>)</b> | <b>% Infection</b> |
|------------------|-------------------------------------------------|--------------------|
| <b>F-Id-3o</b>   | 3                                               | $69.1 \pm 13.1$    |
| <b>PF74</b>      | 0.05                                            | $45.8 \pm 8.8$     |
| <b>DMSO</b>      | -                                               | $100.0 \pm 8.4$    |

### III. Metabolic Stability in Human Liver Microsomes

The metabolic stability in human liver microsomes of compounds was determined in WuXi AppTec Co. Ltd. (Shanghai), China. The detailed procedure is as follows:

#### 1. Test Compounds

**Table S2.** Compounds information

| Compound No. | Compound ID  | Batch No. | Exact Mass | Stock Concentration (mM) |
|--------------|--------------|-----------|------------|--------------------------|
| 1            | F-Id-3o      | F-Id-3o   | 609.20     | 10                       |
| 2            | PF74         | PF74      | 425.21     | 10                       |
| Control      | Testosterone |           | 288.42     | 10                       |
| Control      | Diclofenac   |           | 295.14     | 10                       |
| Control      | Propafenone  |           | 341.44     | 10                       |

#### 2. Experimental Procedure

##### 2.1. Test Compound and Control Working Solution Preparation

**2.1.1. Working solution:** 5  $\mu$ L of compound and control stock solution (10 mM in dimethyl sulfoxide (DMSO)) were diluted with 495  $\mu$ L of acetonitrile (ACN) (intermediate solution concentration: 100  $\mu$ M, 99% ACN).

##### 2.2. NADPH Cofactor Preparation

###### 2.2.1. Materials

NADPH powder:  $\beta$ -Nicotinamide adenine dinucleotide phosphate reduced form, tetrasodium salt; NADPH $\cdot$ 4Na (Vendor: Chem-Impex International, Cat. No. 00616).

###### 2.2.2. Preparation Procedure

The appropriate amount of NADPH powder was weighed and diluted into a 10 mM MgCl<sub>2</sub> solution (working solution concentration: 10 mM; final concentration in reaction system: 1 mM).

##### 2.3. Liver Microsomes Preparation

###### 2.3.1. Materials

**Table S3.** Liver Microsomes Information

| Species | Product Information             | Vendor  | Abbreviation |
|---------|---------------------------------|---------|--------------|
| Human   | Cat No. 452117<br>Lot No. 38295 | Corning | HLM          |

###### 2.3.2. Preparation Procedure

The appropriate concentrations of microsome working solutions were prepared in 100 mM potassium phosphate buffer.

#### 2.4. Stop Solution Preparation

Cold (4°C) acetonitrile (ACN) containing 200 ng/mL tolbutamide and 200 ng/mL labetalol as internal standards (IS) was used as the stop solution.

#### 2.5. Assay Procedure

2.5.1. Pre-warm empty 'Incubation' plates T60 and NCF60 for 10 min minutes.

2.5.2. Dilute liver microsomes to 0.56 mg/mL in 100 mM phosphate buffer.

2.5.3. Transfer 445  $\mu$ L microsome working solutions (0.56 mg/mL) into pre-warmed 'Incubation' plates T60 and NCF60, Then pre-incubate 'Incubation' plates T60 and NCF60 for 10 min at 37°C with constant shaking. Transfer 54  $\mu$ L liver microsomes to blank plate, then add 6  $\mu$ L NADPH cofactor to blank plate, and then add 180  $\mu$ L quenching solution to blank plate.

2.5.4. Add 5  $\mu$ L compound working solution (100  $\mu$ M) into 'incubation' plates (T60 and NCF60) containing microsomes and mix 3 times thoroughly.

2.5.5. For the NCF60 plate, add 50  $\mu$ L of buffer and mix 3 times thoroughly. Start timing; plate will be incubated at 37°C for 60 min while shaking.

2.5.6. In 'Quenching' plate T0, add 180  $\mu$ L quenching solution and 6  $\mu$ L NADPH cofactor. Ensure the plate is chilled to prevent evaporation.

2.5.7. For the T60 plate, mix 3 times thoroughly, and immediately remove 54  $\mu$ L mixture for the 0-min time point to 'Quenching' plate. Then add 44  $\mu$ L NADPH cofactor to incubation plate (T60). Start timing; plate will be incubated at 37°C for 60 min while shaking.

**Table S4.** Final Concentration of Each Component in Incubation Medium

| Component        | Concentration     |
|------------------|-------------------|
| Microsome        | 0.5 mg protein/mL |
| Test Compound    | 1 $\mu$ M         |
| Control Compound | 1 $\mu$ M         |
| Acetonitrile     | 0.99%             |
| DMSO             | 0.01%             |

2.5.8. At 5, 15, 30, 45, and 60 min, add 180  $\mu$ L quenching solution to 'Quenching' plates,

mix once, and serially transfer 60 µL sample from T60 plate per time point to 'Quenching' plates.

**Table S5.** Reaction Plates Incubation

| Time Point | Start Time                                      | End Time |
|------------|-------------------------------------------------|----------|
| Blank      | 1:00:00                                         | 0:00:00  |
| T60        | 1:00:00                                         | 0:00:00  |
| T45        | 0:45:00                                         | 0:00:00  |
| T30        | 0:30:00                                         | 0:00:00  |
| T15        | 0:15:00                                         | 0:00:00  |
| T5         | 0:05:00                                         | 0:00:00  |
| T0         | mix 3 times and remove out to 'Quenching' plate |          |

**2.5.9.** For NCF60: mix once, and transfer 60 µL sample from the NCF60 incubation to 'Quenching' plate containing quenching solution at the 60-min time point.

**Table S6.** NCF60 Incubation

| Time Point | Start Time | End Time |
|------------|------------|----------|
| NCF60      | 1:00:00    | 0:00:00  |

**2.5.10.** All sampling plates are shaken for 10 min, then centrifuged at 4000 rpm for 20 minutes at 4°C.

**2.5.11.** Transfer 80 µL supernatant into 240 µL HPLC water, and mix by plate shaker for 10 min.

**2.5.12.** Each bioanalysis plate was sealed and shaken for 10 minutes prior to LC-MS/MS analysis.

### 3. Data Analysis

**3.1.** The equation of first order kinetics was used to calculate T1/2 and CL<sub>int</sub>(mic) (µL/min/mg).

Equation of first order kinetics:

$$C_t = C_0 \cdot e^{-k_e \cdot t}$$

$$\text{when } C_t = \frac{1}{2} C_0,$$

$$T_{1/2} = \frac{\text{Ln}2}{k_e} = \frac{0.693}{k_e}$$

$$CL_{\text{int}(\text{mic})} = \frac{0.693}{\text{In vitro } T_{1/2}} \cdot \frac{1}{\text{mg / mL microsomal protein in reaction system}}$$

$$CL_{\text{int}(\text{liver})} = CL_{\text{int}(\text{mic})} \cdot \frac{\text{mg microsomes}}{\text{g liver}} \cdot \frac{\text{g liver}}{\text{kg body weight}}$$

## **4. Raw Data**



| Compound ID | Compound & Species | Time (min) | Analyte Peak Area | IS Peak Area | Analyte/IS | % Remaining | Time (min) | % Remaining | Ln (%Remaining) | R <sup>2</sup> | k <sub>e</sub> (min <sup>-1</sup> ) | T <sub>1/2</sub> (min) | CL <sub>int(mic)</sub> (μL/min/mg) | Remaining (T=60min) | Remaining (NCF=60min) |
|-------------|--------------------|------------|-------------------|--------------|------------|-------------|------------|-------------|-----------------|----------------|-------------------------------------|------------------------|------------------------------------|---------------------|-----------------------|
| F2-Id-3o    | F2-Id-3oHLM 0.5    | Blank      | 0                 | 109,031      | 0.000      | 0.0         |            |             |                 | 0.9520         | 0.1840                              | 3.8                    | 368.1                              | 0.23%               | 96.1%                 |
| F2-Id-3o    | F2-Id-3oHLM 0.5    | 60         | 1,522             | 114,468      | 0.013      | 0.2         |            |             |                 |                |                                     |                        |                                    |                     |                       |
| F2-Id-3o    | F2-Id-3oHLM 0.5    | 45         | 1,301             | 106,444      | 0.012      | 0.2         |            |             |                 |                |                                     |                        |                                    |                     |                       |
| F2-Id-3o    | F2-Id-3oHLM 0.5    | 30         | 1,923             | 110,290      | 0.017      | 0.3         | 30         | 0.3         | -1.2            |                |                                     |                        |                                    |                     |                       |
| F2-Id-3o    | F2-Id-3oHLM 0.5    | 15         | 12,365            | 100,738      | 0.123      | 2.1         | 15         | 2.1         | 0.7             |                |                                     |                        |                                    |                     |                       |
| F2-Id-3o    | F2-Id-3oHLM 0.5    | 5          | 81,047            | 98,665       | 0.821      | 14.1        | 5          | 14.1        | 2.6             |                |                                     |                        |                                    |                     |                       |
| F2-Id-3o    | F2-Id-3oHLM 0.5    | 0          | 597,258           | 102,666      | 5.817      | 100.0       | 0          | 100.0       | 4.6             |                |                                     |                        |                                    |                     |                       |
| F2-Id-3o    | F2-Id-3oHLM 0.5    | NCF60      | 606,194           | 108,444      | 5.590      | 96.1        |            |             |                 |                |                                     |                        |                                    |                     |                       |
| PF74        | PF74HLM 0.5        | Blank      | 0                 | 116,908      | 0.000      | 0.0         |            |             |                 | 1.0000         | 1.4312                              | 0.48                   | 2862.5                             | 0.0%                | 112.6%                |
| PF74        | PF74HLM 0.5        | 60         | 0                 | 115,817      | 0.000      | 0.0         |            |             |                 |                |                                     |                        |                                    |                     |                       |
| PF74        | PF74HLM 0.5        | 45         | 0                 | 102,033      | 0.000      | 0.0         |            |             |                 |                |                                     |                        |                                    |                     |                       |
| PF74        | PF74HLM 0.5        | 30         | 61                | 106,730      | 0.001      | 0.0         |            |             |                 |                |                                     |                        |                                    |                     |                       |
| PF74        | PF74HLM 0.5        | 15         | 212               | 99,964       | 0.002      | 0.0         |            |             |                 |                |                                     |                        |                                    |                     |                       |
| PF74        | PF74HLM 0.5        | 5          | 1,231             | 104,970      | 0.012      | 0.1         | 5          | 0.1         | -2.6            |                |                                     |                        |                                    |                     |                       |
| PF74        | PF74HLM 0.5        | 0          | 1,486,739         | 98,654       | 15.070     | 100.0       | 0          | 100.0       | 4.6             |                |                                     |                        |                                    |                     |                       |
| PF74        | PF74HLM 0.5        | NCF60      | 1,738,223         | 102,451      | 16.966     | 112.6       |            |             |                 |                |                                     |                        |                                    |                     |                       |
| Diclofenac  | DiclofenacHLM 0.5  | Blank      | 0                 | 105,690      | 0.000      | 0.0         |            |             |                 | 0.9947         | 0.1860                              | 3.7                    | 372.0                              | 0.0%                | 96.7%                 |
| Diclofenac  | DiclofenacHLM 0.5  | 60         | 0                 | 104,657      | 0.000      | 0.0         |            |             |                 |                |                                     |                        |                                    |                     |                       |
| Diclofenac  | DiclofenacHLM 0.5  | 45         | 0                 | 98,189       | 0.000      | 0.0         |            |             |                 |                |                                     |                        |                                    |                     |                       |
| Diclofenac  | DiclofenacHLM 0.5  | 30         | 303               | 101,980      | 0.003      | 0.4         | 30         | 0.4         | -1.0            |                |                                     |                        |                                    |                     |                       |
| Diclofenac  | DiclofenacHLM 0.5  | 15         | 3,460             | 99,988       | 0.035      | 4.2         | 15         | 4.2         | 1.4             |                |                                     |                        |                                    |                     |                       |
| Diclofenac  | DiclofenacHLM 0.5  | 5          | 26,146            | 102,565      | 0.255      | 30.7        | 5          | 30.7        | 3.4             |                |                                     |                        |                                    |                     |                       |
| Diclofenac  | DiclofenacHLM 0.5  | 0          | 82,212            | 98,999       | 0.830      | 100.0       | 0          | 100.0       | 4.6             |                |                                     |                        |                                    |                     |                       |

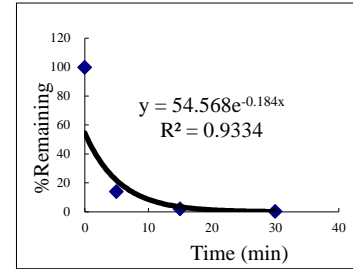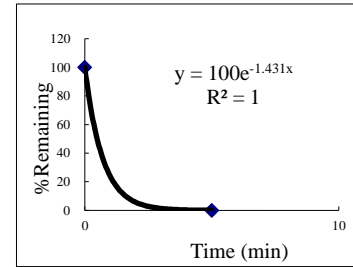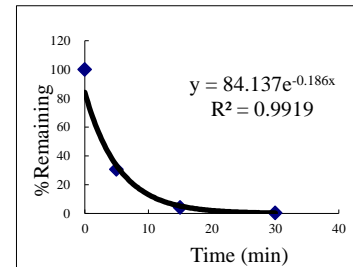

|              |                     |       |         |         |       |       |    |       |      |  |  |  |        |        |      |       |      |       |  |
|--------------|---------------------|-------|---------|---------|-------|-------|----|-------|------|--|--|--|--------|--------|------|-------|------|-------|--|
| Diclofenac   | DiclofenacHLM 0.5   | NCF60 | 83,751  | 104,298 | 0.803 | 96.7  |    |       |      |  |  |  |        |        |      |       |      |       |  |
| Propafenone  | PropafenoneHLM 0.5  | Blank | 63      | 105,722 | 0.001 | 0.0   |    |       |      |  |  |  | 0.9350 | 0.1397 | 5.0  | 279.5 | 0.0% | 93.6% |  |
| Propafenone  | PropafenoneHLM 0.5  | 60    | 63      | 100,264 | 0.001 | 0.0   |    |       |      |  |  |  |        |        |      |       |      |       |  |
| Propafenone  | PropafenoneHLM 0.5  | 45    | 1,024   | 97,056  | 0.011 | 0.2   | 45 | 0.2   | -1.9 |  |  |  |        |        |      |       |      |       |  |
| Propafenone  | PropafenoneHLM 0.5  | 30    | 40,148  | 101,776 | 0.394 | 5.6   | 30 | 5.6   | 1.7  |  |  |  |        |        |      |       |      |       |  |
| Propafenone  | PropafenoneHLM 0.5  | 15    | 258,004 | 95,967  | 2.688 | 38.5  | 15 | 38.5  | 3.7  |  |  |  |        |        |      |       |      |       |  |
| Propafenone  | PropafenoneHLM 0.5  | 5     | 499,263 | 104,023 | 4.800 | 68.7  | 5  | 68.7  | 4.2  |  |  |  |        |        |      |       |      |       |  |
| Propafenone  | PropafenoneHLM 0.5  | 0     | 659,116 | 94,347  | 6.986 | 100.0 | 0  | 100.0 | 4.6  |  |  |  |        |        |      |       |      |       |  |
| Propafenone  | PropafenoneHLM 0.5  | NCF60 | 671,724 | 102,762 | 6.537 | 93.6  |    |       |      |  |  |  |        |        |      |       |      |       |  |
| Testosterone | TestosteroneHLM 0.5 | Blank | 223     | 112,647 | 0.002 | 0.2   |    |       |      |  |  |  | 0.9982 | 0.0414 | 16.7 | 82.8  | 7.9% | 90.7% |  |
| Testosterone | TestosteroneHLM 0.5 | 60    | 7,607   | 108,076 | 0.070 | 7.9   | 60 | 7.9   | 2.1  |  |  |  |        |        |      |       |      |       |  |
| Testosterone | TestosteroneHLM 0.5 | 45    | 14,283  | 107,692 | 0.133 | 14.9  | 45 | 14.9  | 2.7  |  |  |  |        |        |      |       |      |       |  |
| Testosterone | TestosteroneHLM 0.5 | 30    | 25,374  | 103,996 | 0.244 | 27.5  | 30 | 27.5  | 3.3  |  |  |  |        |        |      |       |      |       |  |
| Testosterone | TestosteroneHLM 0.5 | 15    | 47,238  | 100,489 | 0.470 | 53.0  | 15 | 53.0  | 4.0  |  |  |  |        |        |      |       |      |       |  |
| Testosterone | TestosteroneHLM 0.5 | 5     | 66,880  | 104,311 | 0.641 | 72.2  | 5  | 72.2  | 4.3  |  |  |  |        |        |      |       |      |       |  |
| Testosterone | TestosteroneHLM 0.5 | 0     | 90,117  | 101,541 | 0.887 | 100.0 | 0  | 100.0 | 4.6  |  |  |  |        |        |      |       |      |       |  |
| Testosterone | TestosteroneHLM 0.5 | NCF60 | 80,291  | 99,693  | 0.805 | 90.7  |    |       |      |  |  |  |        |        |      |       |      |       |  |

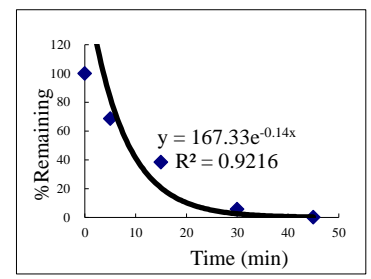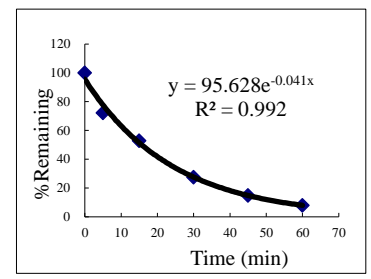

## IV. Stability in Human Plasma

The Stability in Human Plasma of compounds was determined in WuXi AppTec Co. Ltd. (Shanghai), China. The detailed procedure is as follows:

### 1. Materials

#### 1.1. Test Compounds and Stock Solutions

| Compound ID            | Batch      | MW     | FW     | Purity (%) | Stock Conc. (mM) | Final Conc.( $\mu$ M) |
|------------------------|------------|--------|--------|------------|------------------|-----------------------|
| F-Id-3o                | F-Id-3o    | 609.6  | NA     | 99.0       | 10               | 2                     |
| PF74                   | PF74       | 425.5  | NA     | 97.1       | 10               | 2                     |
| Proprantheline bromide | R000190915 | 448.39 | 448.39 | 97.00      | 10               | 2                     |

#### 1.2. Test Compound and Control Working Solution Preparation

**1.2.1.** Test compound Working solution: 5  $\mu$ L of compound stock solution (10 mM in dimethyl sulfoxide (DMSO)) were diluted with 495  $\mu$ L of DMSO (Working solution concentration: 100  $\mu$ M, 100% DMSO).

**1.2.2.** Proprantheline bromide Working solution: 5  $\mu$ L of Proprantheline bromide stock solution (10 mM in H<sub>2</sub>O) were diluted with 495  $\mu$ L of H<sub>2</sub>O (Working solution concentration: 100  $\mu$ M, 100% H<sub>2</sub>O).

#### 1.3. Test System

| Species / Matrix | Minimum No. of Individuals | Anticoagulant Used | Vendor             | Cat#          | Batch     |
|------------------|----------------------------|--------------------|--------------------|---------------|-----------|
| Human Plasma     | 3 Male & 3 Female          | EDTA-K2            | Bioreclamation IVT | HUMANPLK2 P2N | HMN514548 |

## 2. Methods

**2.1.** The pooled frozen plasma was thawed in a water bath at 37°C prior to experiment. Plasma was centrifuged at 4000 rpm for 5 min and the clots were removed if any.

**2.2.** Using an Apricot automation workstation, 98  $\mu$ L/well of blank plasma were added to all 96-well reaction plates. (Blank, T0, T10, T30, T60, and T120)

**2.3.** An Apricot automation workstation was used to add 2  $\mu$ L/well of working solution (100  $\mu$ M) to all reaction plates except Blank. (T0, T10, T30, T60, and T120)

**2.4.** All reaction plates containing mixtures of compound and plasma were incubated at 37°C in water bath.

2.5. The reaction plates were incubated at 37°C, and timer was started.

**Table S7.** Reaction Plates Incubation

| Time Point | Start Time | End Time |
|------------|------------|----------|
| Blank      | 0:00:00    | 0:00:00  |
| T120       | 2:00:00    | 0:00:00  |
| T60        | 1:00:00    | 0:00:00  |
| T30        | 0:30:00    | 0:00:00  |
| T10        | 0:10:00    | 0:00:00  |
| T0         |            |          |

2.6. At the end of incubation, added 400 µL of stop solution (200 ng/mL tolbutamide and 200 ng/mL labetalol in ACN) to precipitate protein. Mixed thoroughly.

2.7. Each plate was sealed and shaken for 20 minutes

2.8. After shaking, each plate was centrifuged at 4000 rpm and 4°C for 20 minutes

2.9. After centrifugation, an Apricot automation workstation was used to transfer 150 µL supernatant.

2.10. Each bioanalysis plate was sealed and shaken for 10 minutes prior to LC-MS/MS analysis

### 3. Data Analysis

The % remaining of test compound after incubation in plasma was calculated using following equation:

$$\% \text{ Remaining} = 100 \times (\text{PAR at appointed incubation time} / \text{PAR at T0 time})$$

where PAR is the peak area ratio of analyte versus internal standard (IS)

The appointed incubation time points are T0 (0 min), Tn (n=0, 10, 30, 60, 120 min)

### 4. Data

| Sample_ID                 | Time (min) | Analyte Peak Area | IS Peak Area | Aa/Ai  | % Remaining (n=2) | Ln (% Remaining) |              |                  |                  |        |
|---------------------------|------------|-------------------|--------------|--------|-------------------|------------------|--------------|------------------|------------------|--------|
| F2-Id-3o_H_0              | 0          | 6.79E+06          | 1.38E+06     | 4.9312 | 100.0             | 0.00             |              | k=               | -0.0001          |        |
| F2-Id-3o_H_0              |            | 6.65E+06          | 1.37E+06     | 4.8473 |                   |                  |              | R <sup>2</sup> = | 0.0178           |        |
| F2-Id-3o_H_10             | 10         | 6.66E+06          | 1.46E+06     | 4.5548 | 95.2              | -0.05            |              | t1/2=0.693/k     | >289.1           |        |
| F2-Id-3o_H_10             |            | 6.79E+06          | 1.43E+06     | 4.7520 |                   |                  |              |                  |                  |        |
| F2-Id-3o_H_30             | 30         | 5.86E+06          | 1.32E+06     | 4.4486 | 89.8              | -0.11            |              |                  |                  |        |
| F2-Id-3o_H_30             |            | 5.88E+06          | 1.36E+06     | 4.3339 |                   |                  |              |                  |                  |        |
| F2-Id-3o_H_60             | 60         | 6.56E+06          | 1.46E+06     | 4.5063 | 91.6              | -0.09            |              |                  |                  |        |
| F2-Id-3o_H_60             |            | 7.13E+06          | 1.60E+06     | 4.4557 |                   |                  |              |                  |                  |        |
| F2-Id-3o_H_120            | 120        | 7.21E+06          | 1.54E+06     | 4.6913 | 99.3              | -0.01            |              |                  |                  |        |
| F2-Id-3o_H_120            |            | 8.73E+06          | 1.74E+06     | 5.0143 |                   |                  |              |                  |                  |        |
| PF74_H_0                  | 0          | 1.03E+07          | 1.45E+06     | 7.1259 | 100.0             | 0.00             |              |                  | k=               | 0.0008 |
| PF74_H_0                  |            | 1.08E+07          | 1.56E+06     | 6.8745 |                   |                  |              |                  | R <sup>2</sup> = | 0.1842 |
| PF74_H_10                 | 10         | 9.50E+06          | 1.59E+06     | 5.9628 | 84.7              | -0.17            | t1/2=0.693/k |                  | >289.1           |        |
| PF74_H_10                 |            | 8.68E+06          | 1.47E+06     | 5.8962 |                   |                  |              |                  |                  |        |
| PF74_H_30                 | 30         | 8.42E+06          | 1.54E+06     | 5.4832 | 81.7              | -0.20            |              |                  |                  |        |
| PF74_H_30                 |            | 8.91E+06          | 1.50E+06     | 5.9541 |                   |                  |              |                  |                  |        |
| PF74_H_60                 | 60         | 8.74E+06          | 1.42E+06     | 6.1381 | 80.7              | -0.21            |              |                  |                  |        |
| PF74_H_60                 |            | 7.65E+06          | 1.48E+06     | 5.1652 |                   |                  |              |                  |                  |        |
| PF74_H_120                | 120        | 8.79E+06          | 1.61E+06     | 5.4640 | 85.2              | -0.16            |              |                  |                  |        |
| PF74_H_120                |            | 1.04E+07          | 1.62E+06     | 6.4621 |                   |                  |              |                  |                  |        |
| Propantheline bromide_H_0 | 0          | 3.32E+06          | 1.74E+06     | 1.9093 | 100.0             | 0.00             |              |                  | k=               | 0.0617 |

|                                |     |          |          |        |      |       |                  |        |
|--------------------------------|-----|----------|----------|--------|------|-------|------------------|--------|
| Propantheline<br>bromide_H_0   |     | 3.22E+06 | 1.64E+06 | 1.9647 |      |       | R <sup>2</sup> = | 0.9961 |
| Propantheline<br>bromide_H_10  | 10  | 2.01E+06 | 1.86E+06 | 1.0818 | 56.5 | -0.57 | t1/2=0.693/k     | 11.2   |
| Propantheline<br>bromide_H_10  |     | 1.91E+06 | 1.73E+06 | 1.1067 |      |       |                  |        |
| Propantheline<br>bromide_H_30  | 30  | 6.75E+05 | 1.89E+06 | 0.3581 | 19.4 | -1.64 |                  |        |
| Propantheline<br>bromide_H_30  |     | 7.44E+05 | 1.90E+06 | 0.3922 |      |       |                  |        |
| Propantheline<br>bromide_H_60  | 60  | 6.60E+04 | 1.77E+06 | 0.0374 | 1.9  | -3.99 |                  |        |
| Propantheline<br>bromide_H_60  |     | 6.11E+04 | 1.78E+06 | 0.0344 |      |       |                  |        |
| Propantheline<br>bromide_H_120 | 120 | 3.75E+03 | 1.98E+06 | 0.0019 | 0.1  | -7.29 |                  |        |
| Propantheline<br>bromide_H_120 |     | 1.14E+03 | 1.52E+06 | 0.0007 |      |       |                  |        |

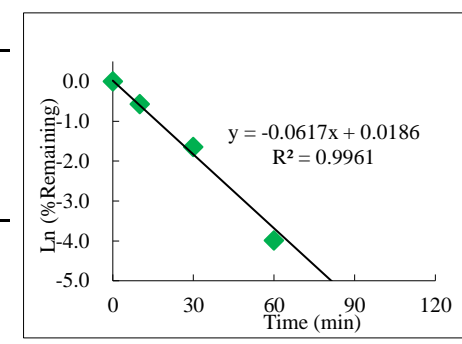

Sample comment: "XXXX\_H\_0" for example, "H" for Human Plasma, "0" was the sample collected at T=0 incubation.

## V. HRMS, <sup>1</sup>H-NMR, <sup>13</sup>C-NMR Spectra and LC-MS for Representative Target Compounds

### 1. HRMS, <sup>1</sup>H-NMR, <sup>13</sup>C-NMR Spectra and LC-MS for Id-3a

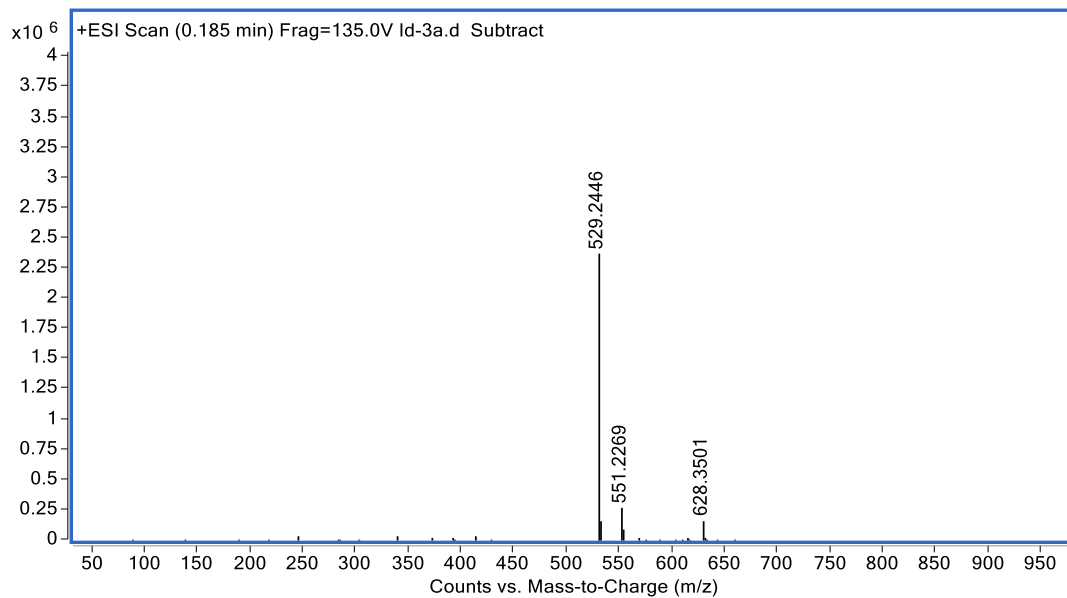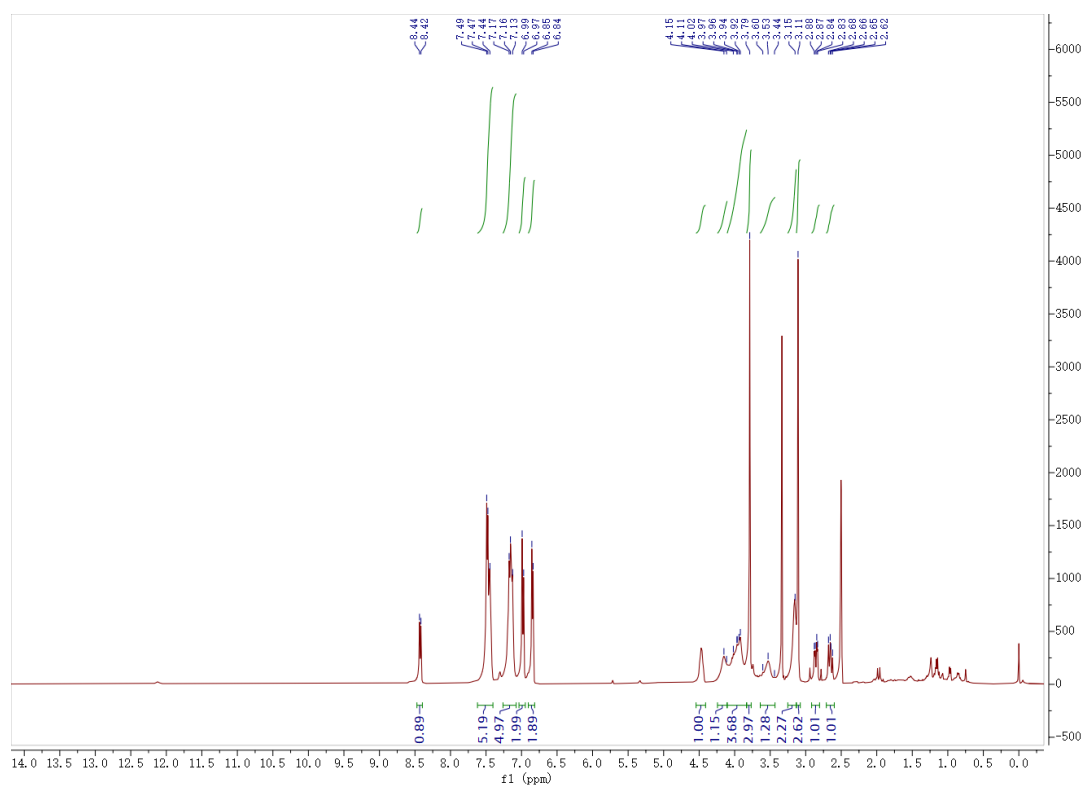

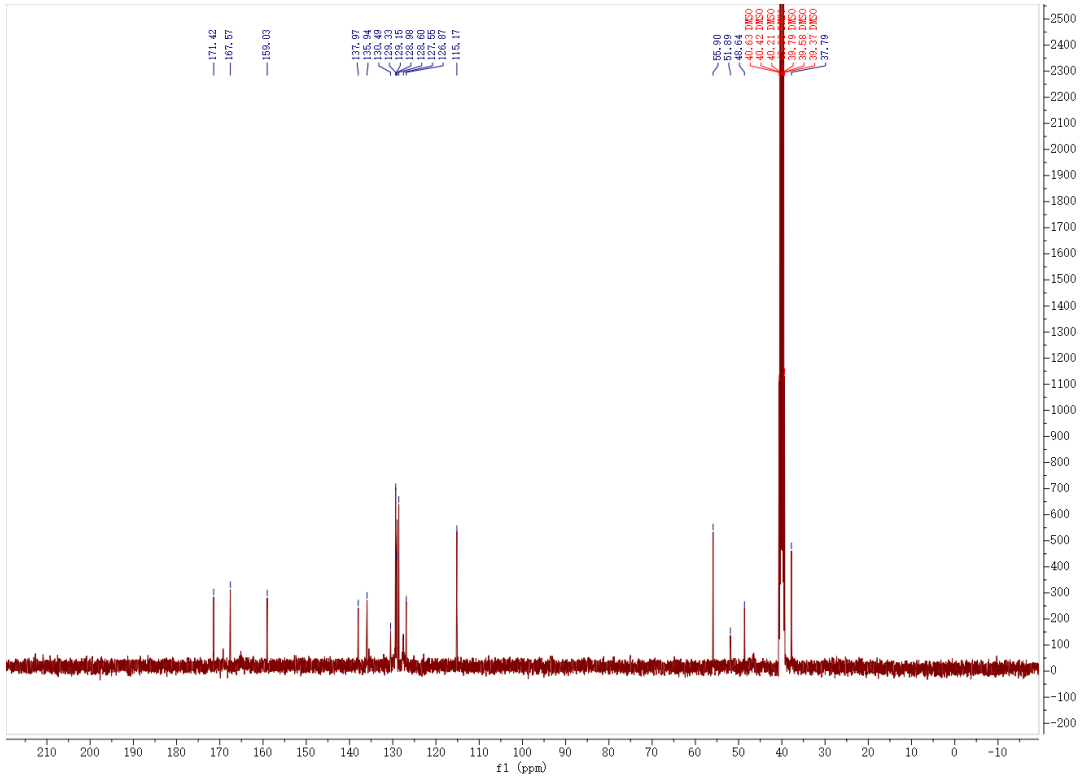

D:\7512\XMD-3A

04/23/23 19:54:45

RT: 0.00 - 9.98 SM 7B

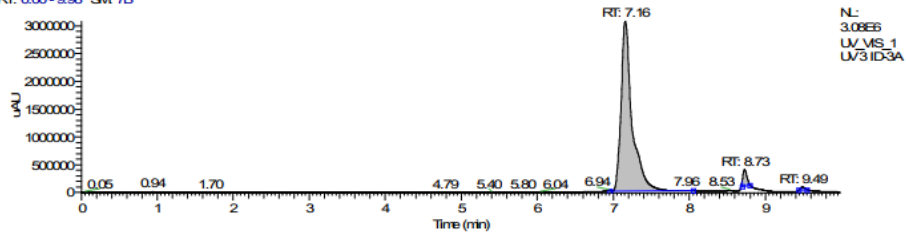

NL:  
3.08E6  
UV\_VIS\_1  
UV3 ID3A

ID-3A#2846 RT: 7.16 Av: 1 NL: 6.10E5  
T: FTMS+c ESI Full ms [150.00-1000.00]

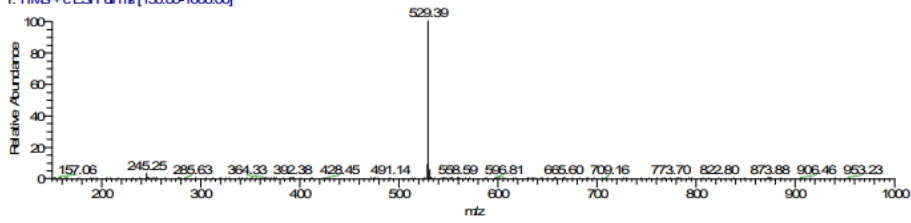

PEAK LIST

ID-3A.raw

RT: 0.00 - 9.98

Number of detected peaks: 3

| Apex RT | Start RT | End RT | Area         | %Area | Height      | %Height |
|---------|----------|--------|--------------|-------|-------------|---------|
| 7.16    | 6.95     | 8.05   | 31063020.494 | 96.13 | 3052643.882 | 89.84   |
| 8.73    | 8.69     | 8.79   | 1074678.634  | 3.33  | 298411.093  | 8.78    |
| 9.49    | 9.44     | 9.54   | 174622.138   | 0.54  | 46710.272   | 1.37    |



## 2. HRMS, <sup>1</sup>H-NMR, <sup>13</sup>C-NMR Spectra and LC-MS for Id-3o

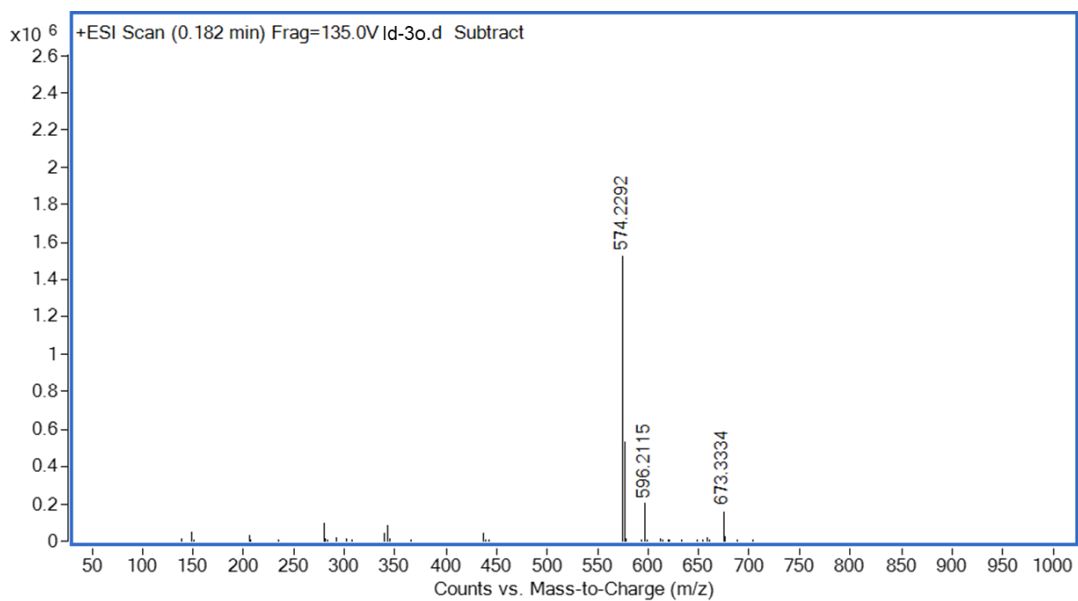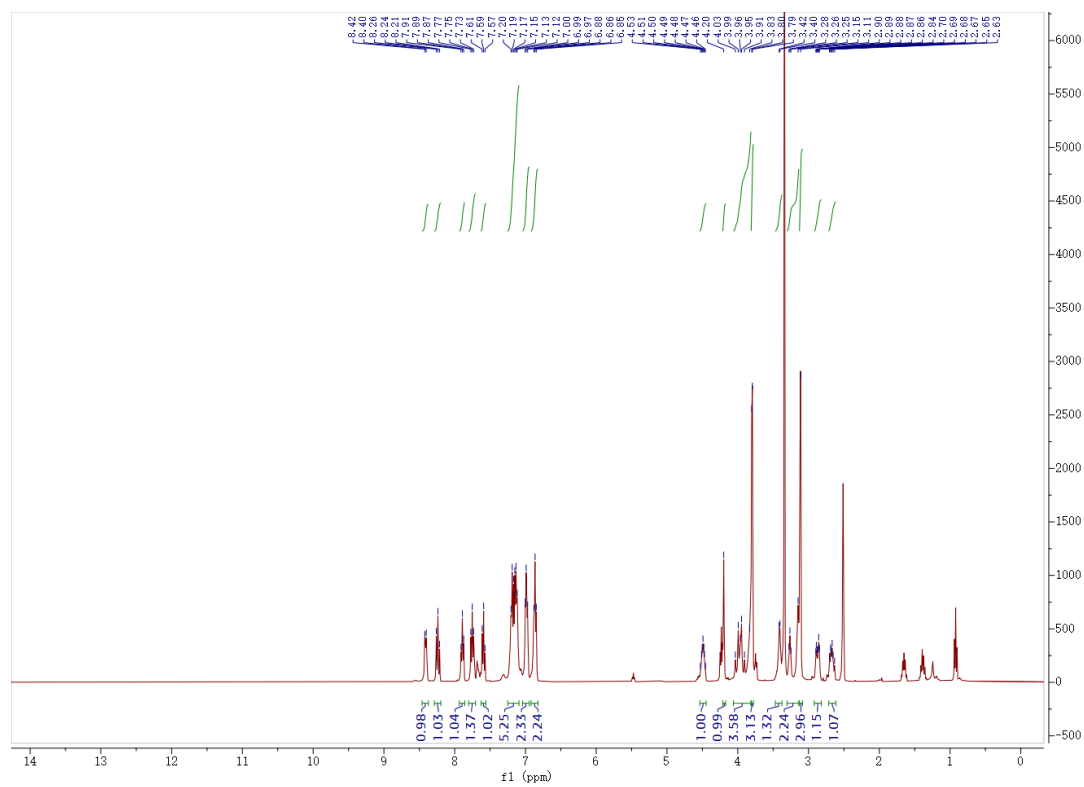

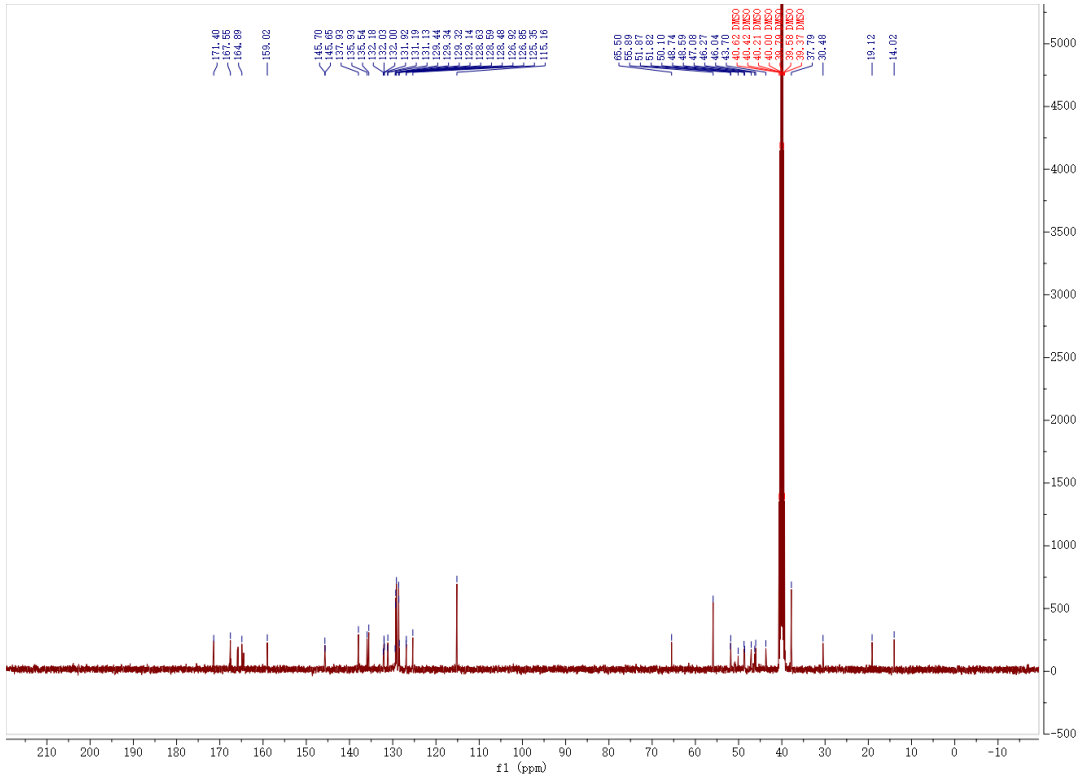

DV7512ZXMID-30

04/23/23 20:08:00

RT: 0.00-9.99 SM 7B

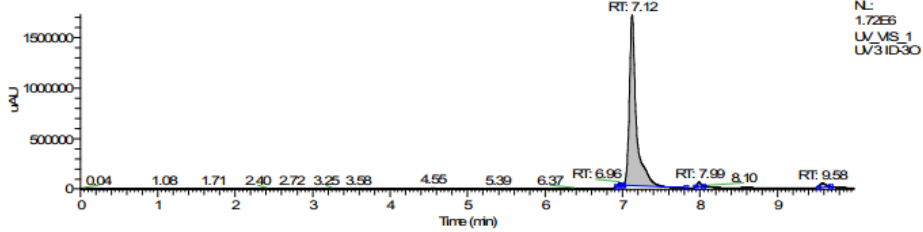

ID-30#2627 RT: 7.11 AM: 1 N: 3.03E5  
T: ITMS+c ESI Full ms [150.00-1000.00]

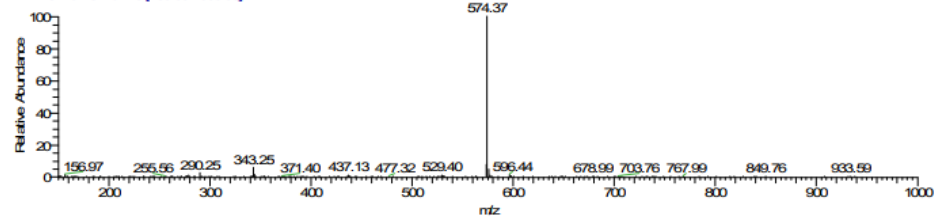

PEAK LIST

ID-30.raw

RT: 7.79 - 8.49

Number of detected peaks: 4

| Apex RT | Start RT | End RT | Area         | %Area | Height      | %Height |
|---------|----------|--------|--------------|-------|-------------|---------|
| 6.96    | 6.92     | 6.99   | 81389.400    | 0.73  | 29124.202   | 1.61    |
| 7.12    | 7.01     | 7.82   | 10615211.543 | 95.67 | 1691932.527 | 93.46   |
| 7.99    | 7.94     | 8.04   | 148923.278   | 1.34  | 44289.115   | 2.45    |
| 9.58    | 9.53     | 9.69   | 249972.226   | 2.25  | 45029.126   | 2.49    |

### 3. HRMS, <sup>1</sup>H-NMR, <sup>13</sup>C-NMR Spectra and LC-MS for F-Id-3a

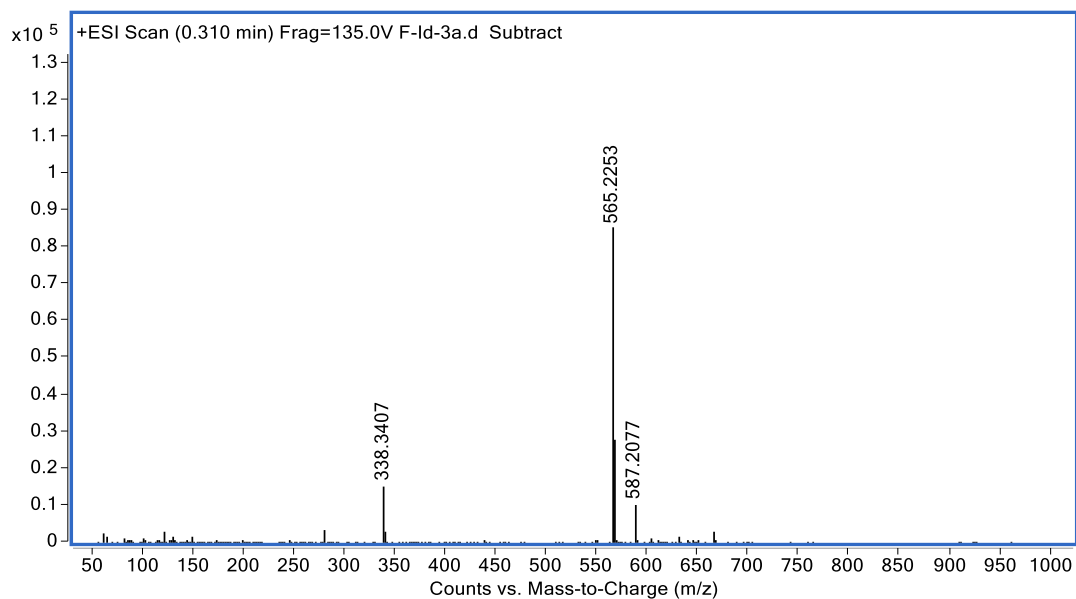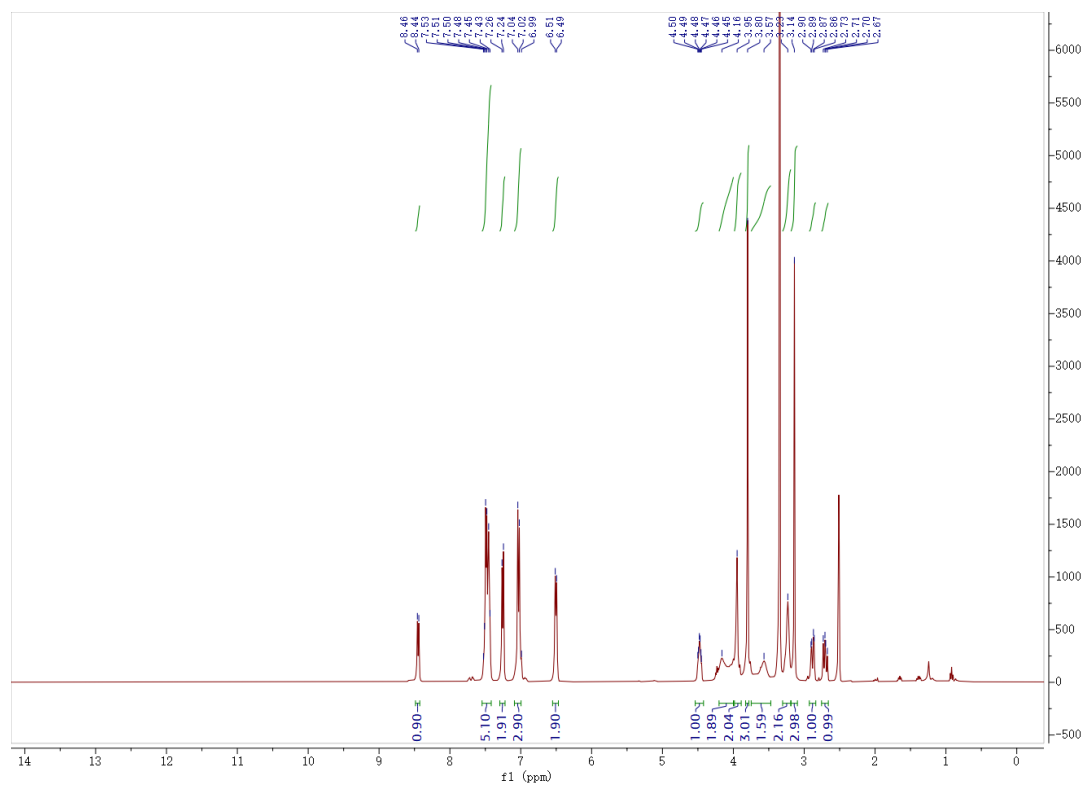

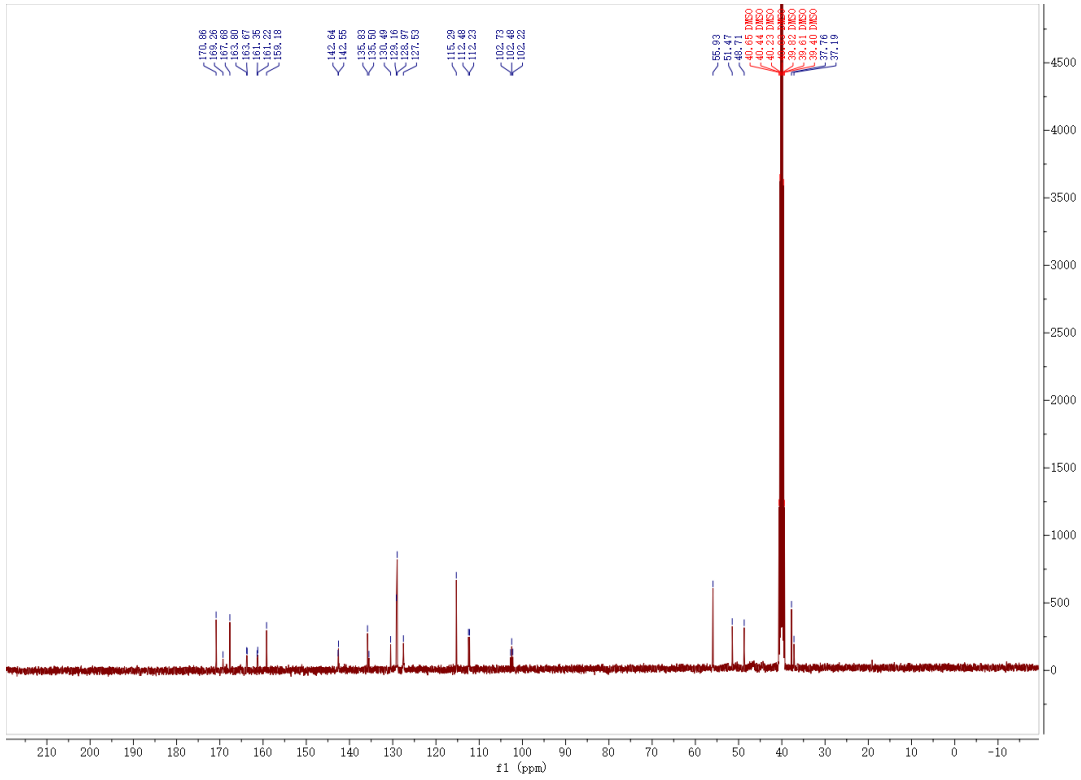

DV7512ZX\F-ID3A

04/23/23 20:21:05

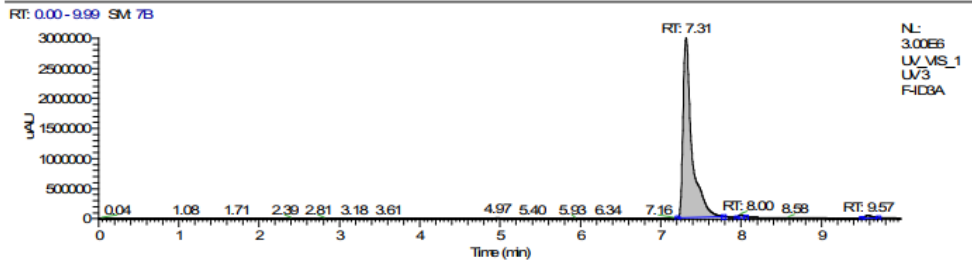

F-ID3A#2700 RT: 7.31 AV: 1 NL: 2.74E5  
T: ITMS+cESI Full ms [150.00-1000.00]

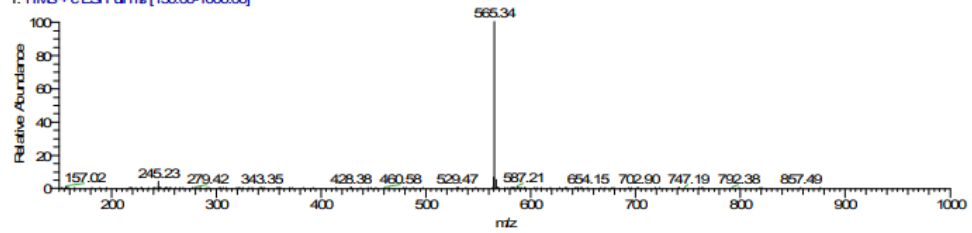

PEAK LIST

F-ID3A.raw

RT: 0.00 - 9.99

Number of detected peaks: 3

| Apex RT | Start RT | End RT | Area         | %Area | Height      | %Height |
|---------|----------|--------|--------------|-------|-------------|---------|
| 7.31    | 7.21     | 7.78   | 22919271.324 | 97.91 | 2985790.723 | 97.02   |
| 8.00    | 7.94     | 8.06   | 178632.347   | 0.76  | 44876.735   | 1.46    |
| 9.57    | 9.50     | 9.70   | 309662.104   | 1.32  | 46943.660   | 1.53    |

#### 4. HRMS, <sup>1</sup>H-NMR, <sup>13</sup>C-NMR Spectra and LC-MS for F-Id-3o

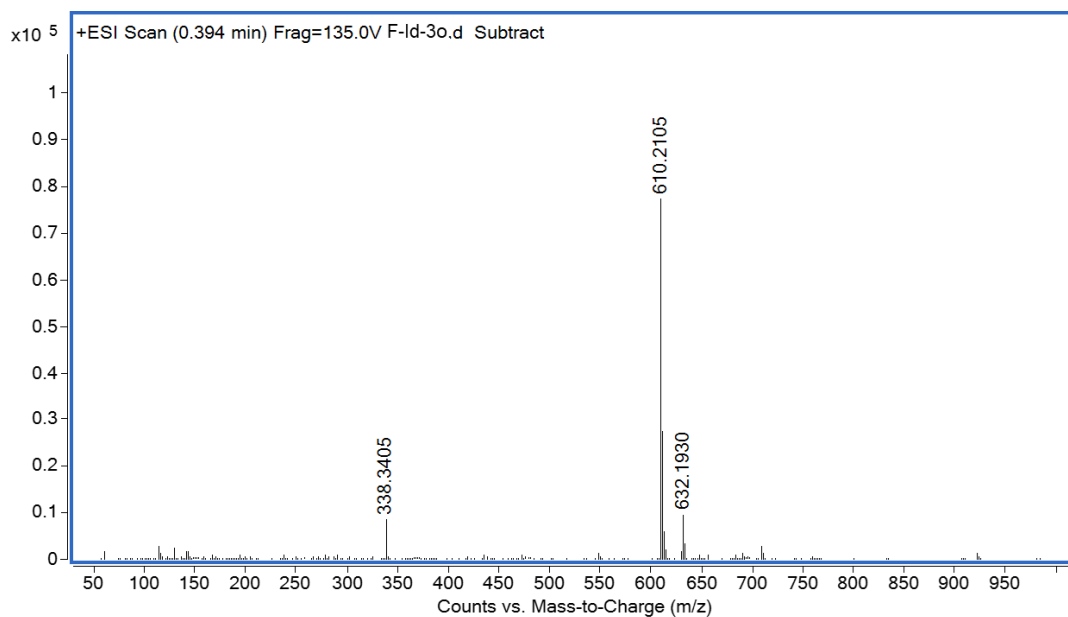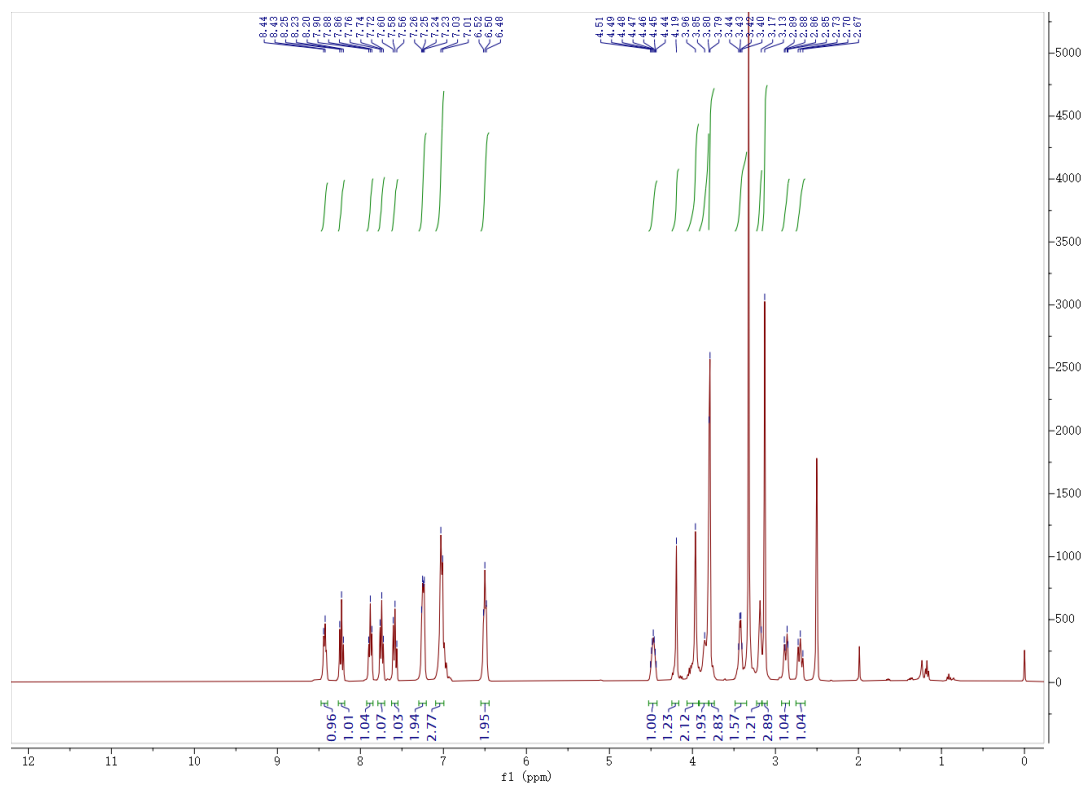

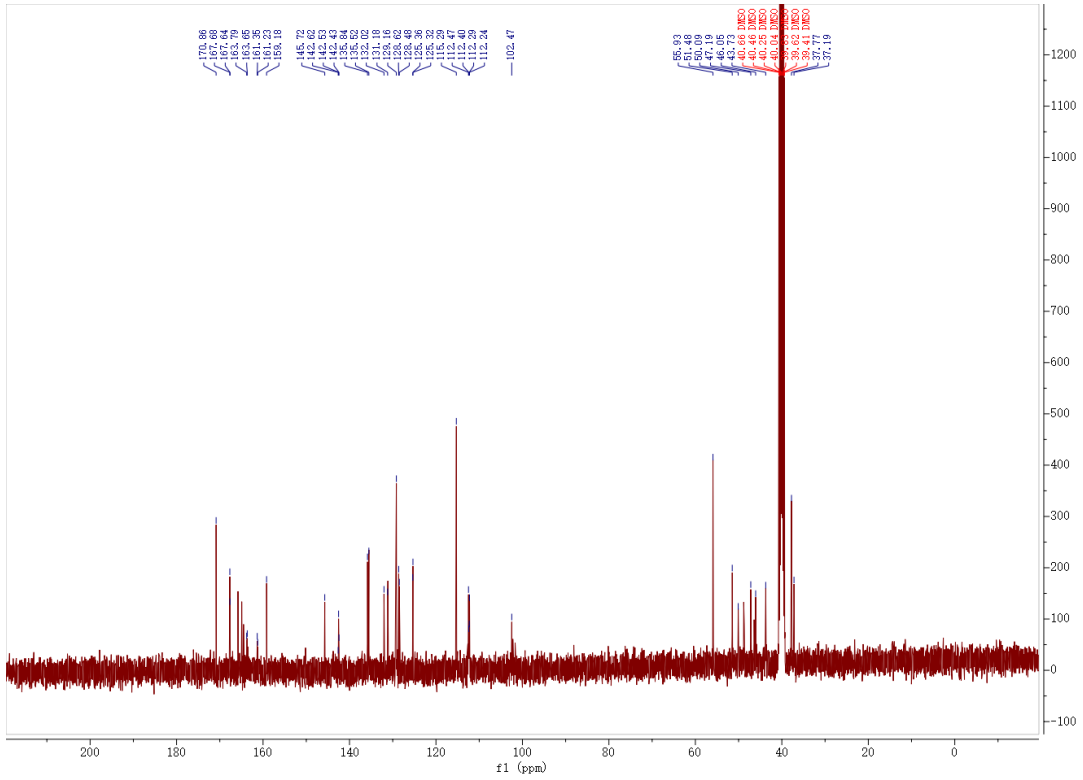

D:\7512\X\FID30

04/23/23 20:33:11

RT: 0.00 - 9.97 SM 7B

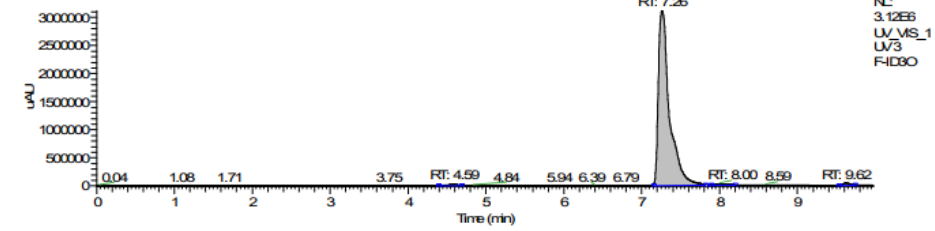

NL:  
3.12E6  
UV\_VIS\_1  
UV3  
FID30

FID30#2683 RT: 7.26 Av: 1 NL: 6.05E5  
T: TMS + cESI Full ms [150.00-1000.00]

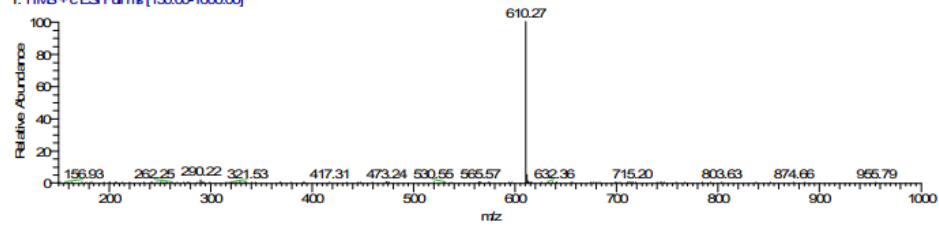

PEAK LIST

F-ID30.raw

RT: 0.00 - 9.97

Number of detected peaks: 4

| Apex RT | Start RT | End RT | Area         | %Area | Height      | %Height |
|---------|----------|--------|--------------|-------|-------------|---------|
| 4.59    | 4.39     | 4.69   | 192337.016   | 0.60  | 24231.895   | 0.75    |
| 7.26    | 7.15     | 7.82   | 31020634.565 | 97.40 | 3112912.629 | 96.86   |
| 8.00    | 7.90     | 8.20   | 337252.425   | 1.06  | 31824.429   | 0.99    |
| 9.62    | 9.53     | 9.74   | 298430.241   | 0.94  | 44894.873   | 1.40    |
